# Supplementary material
Source: publisher site journal article supplement (https://static.cambridge.org/content/id/urn:cambridge.org:id:article:S1755773919000341/resource/name/S1755773919000341supp001.pdf)
Supplement: Supplementary file 1 [file S1755773919000341supp001.pdf]

# Appendix

Table A.1: Descriptive Statistics: Individual-level Variables

|                               | Minimum | Median | Mean   | Maximum |
|-------------------------------|---------|--------|--------|---------|
| Pro-Technology Index (PTI)    | 0       | 2.072  | 2.019  | 2.711   |
| PTI 2 (Geometric Averaging)   | 1       | 5.826  | 5.610  | 7.401   |
| Pro-Welfare State Index (PWI) | 0       | 1.442  | 1.440  | 2.394   |
| PWI 2 (Geometric Averaging)   | 1       | 5.692  | 5.854  | 10      |
| Education                     | 1       | 6      | 5.82   | 9       |
| Routine                       | 1       | 6      | 6.239  | 10      |
| Age                           | 16      | 39     | 41.41  | 99      |
| Female                        | 0       | 1      | 0.5054 | 1       |
| Income                        | 1       | 5      | 4.937  | 10      |
| (Religious) Disbelief         | 0       | 0.2778 | 0.3716 | 1.014   |
| IT Familiarity                | 1       | 3      | 2.989  | 5       |
| Political Trust               | 1       | 2.400  | 2.396  | 4       |

Table A.2: Descriptive Statistics II: Country Mean of Selected Variables

|                   | PTI | PWI | Year | GDP per Capita | Social Spending | Unemp. Protection | Wage Coord. | ALMP Spending |
|-------------------|-----|-----|------|----------------|-----------------|-------------------|-------------|---------------|
| Algeria           | 5.5 | 6.0 | 2013 | 4596.2         | 8.5             | 8.8               |             |               |
| Argentina         | 5.3 | 5.7 | 2013 | 10699.2        | 13.1            | 4.9               | 3           |               |
| Armenia           | 5.8 | 7.1 | 2011 | 3371.7         | 6.4             | 15.8              |             |               |
| Australia         | 5.7 | 4.6 | 2012 | 53315.0        | 17.5            | 52.7              | 2           | 0.3           |
| Azerbaijan        | 6.2 | 6.2 | 2011 | 5771.0         | 8.1             | 2.5               |             |               |
| Bahrain           | 5.2 | 4.8 | 2014 | 22390.7        | 4.0             | 9.8               |             |               |
| Belarus           | 6.0 | 6.1 | 2011 | 6375.3         | 15.8            | 46.1              |             |               |
| Brazil            | 5.1 | 5.2 | 2014 | 11866.4        | 15.3            | 7.8               | 3           |               |
| Chile             | 5.2 | 6.7 | 2011 | 13518.8        | 13.5            | 29.9              | 1           | 0.1           |
| China             | 6.2 | 6.9 | 2012 | 5336.1         | 8.0             | 9.1               | 5           |               |
| Colombia          | 5.1 | 5.0 | 2012 | 6789.5         | 13.3            | 0.0               |             |               |
| Cyprus            | 5.4 | 6.0 | 2011 | 30138.6        | 21.5            | 78.7              | 2           |               |
| Ecuador           | 5.4 | 5.2 | 2013 | 5311.2         | 4.7             | 4.2               |             |               |
| Egypt             | 6.1 | 6.9 | 2013 | 2591.1         | 11.8            | 0.0               |             |               |
| Estonia           | 5.9 | 7.2 | 2011 | 15798.6        | 16.3            | 27.6              | 1           | 0.2           |
| Georgia           | 5.8 | 5.6 | 2014 | 3851.7         | 4.0             | 0.0               |             |               |
| Germany           | 5.8 | 6.4 | 2013 | 44354.7        | 24.8            | 88.0              | 4           | 0.6           |
| Ghana             | 5.7 | 4.6 | 2012 | 1558.5         | 5.4             | 0.0               |             |               |
| India             | 5.2 | 6.1 | 2014 | 1646.8         | 2.4             | 3.0               | 2           |               |
| India2            | 5.2 | 6.1 | 2012 | 1475.0         | 2.4             | 3.0               | 2           |               |
| Japan             | 5.7 | 5.5 | 2010 | 44507.7        | 22.1            | 21.5              | 4           | 0.3           |
| Jordan            | 5.6 | 6.2 | 2014 | 3348.8         | 9.8             | 0.0               |             |               |
| Kazakhstan        | 6.2 | 6.8 | 2011 | 9603.6         | 6.3             | 0.4               |             |               |
| Kuwait            | 5.9 | 5.6 | 2014 | 36259.4        | 11.4            | 0.0               |             |               |
| Kyrgyzstan        | 5.7 | 5.3 | 2011 | 921.2          | 8.3             | 0.9               |             |               |
| Lebanon           | 4.8 | 5.3 | 2013 | 7753.9         | 0.9             | 0.0               |             |               |
| Malaysia          | 5.6 | 5.5 | 2012 | 9708.9         | 3.8             | 0.0               |             |               |
| Mexico            | 5.3 | 4.9 | 2012 | 9414.9         | 10.5            | 0.0               | 1           | 0.0           |
| Netherlands       | 5.7 | 5.6 | 2012 | 50213.0        | 22.5            | 61.9              | 4           | 0.9           |
| New Zealand       | 5.2 | 4.4 | 2011 | 34194.4        | 19.9            | 32.9              | 1           | 0.3           |
| Nigeria           | 5.6 | 5.4 | 2011 | 2376.6         | 0.5             | 0.0               |             |               |
| Pakistan          | 5.7 | 6.4 | 2012 | 1060.5         | 0.2             | 0.0               |             |               |
| Peru              | 5.2 | 4.9 | 2012 | 5520.6         | 4.8             | 0.0               |             |               |
| Philippines       | 5.1 | 5.3 | 2012 | 2278.6         | 1.9             | 0.0               |             |               |
| Poland            | 6.0 | 5.6 | 2012 | 13435.5        | 19.0            | 16.8              | 1           | 0.4           |
| Romania           | 5.6 | 5.7 | 2012 | 8518.3         | 15.4            | 35.6              | 2           |               |
| Russia            | 6.0 | 7.3 | 2011 | 11230.4        | 14.9            | 20.6              |             |               |
| Rwanda            | 6.2 | 6.2 | 2012 | 627.9          | 7.3             | 0.0               |             |               |
| Singapore         | 5.5 | 5.4 | 2012 | 49103.7        | 3.1             | 0.0               | 3           |               |
| Slovenia          | 5.5 | 6.3 | 2011 | 23540.7        | 23.5            | 30.8              | 3           | 0.3           |
| South Africa      | 5.4 | 5.9 | 2013 | 7552.3         | 10.0            | 13.5              | 3           |               |
| South Korea       | 5.6 | 6.2 | 2010 | 22087.0        | 8.3             | 45.5              | 3           | 0.3           |
| Sweden            | 5.6 | 4.9 | 2011 | 53061.6        | 25.8            | 28.0              | 4           | 1.2           |
| Taiwan            | 5.5 | 6.1 | 2012 | 21308.0        | 9.7             | 15.8              |             |               |
| Thailand          | 5.0 | 6.2 | 2013 | 5561.3         | 4.3             | 28.5              |             |               |
| Trinidad & Tobago | 5.5 | 4.1 | 2011 | 16551.5        | 4.0             | 0.0               |             |               |
| Tunisia           | 5.4 | 6.7 | 2013 | 4196.8         | 9.0             | 3.0               |             |               |
| Turkey            | 5.9 | 7.1 | 2011 | 11683.2        | 12.5            | 7.7               | 2           |               |
| Ukraine           | 5.9 | 7.5 | 2011 | 3138.5         | 17.4            | 20.9              |             |               |
| United States     | 5.5 | 4.2 | 2011 | 48783.5        | 19.1            | 26.5              | 1           | 0.1           |
| Uruguay           | 5.3 | 5.5 | 2011 | 12512.9        | 17.9            | 27.9              |             |               |
| Uzbekistan        | 6.6 | 6.5 | 2011 | 1451.9         | 12.8            | 39.5              |             |               |
| Yemen             | 6.3 | 6.6 | 2014 | 1101.1         | 9.6             | 0.0               |             |               |
| Zimbabwe          | 5.6 | 5.1 | 2012 | 913.5          | 5.6             | 0.0               |             |               |

Table A.3: Robustness Checks

| DV:                    | PTI                  | PTI2                 | V192                 | PWI2                  | V137                  |
|------------------------|----------------------|----------------------|----------------------|-----------------------|-----------------------|
|                        | (1)                  | (2)                  | (3)                  | (4)                   | (5)                   |
| Education              | 0.015***<br>(0.001)  | 0.043***<br>(0.002)  | 0.059***<br>(0.004)  | -0.033***<br>(0.004)  | -0.068***<br>(0.006)  |
| Social Spending        | 0.155***<br>(0.046)  | 0.022***<br>(0.009)  | 0.021*<br>(0.012)    | 0.129<br>(0.159)      | 0.124<br>(0.156)      |
| PTI2                   |                      |                      |                      | 0.144***<br>(0.006)   |                       |
| V192                   |                      |                      |                      |                       | 0.079***<br>(0.005)   |
| Age                    | 0.0003**<br>(0.0001) | 0.0003<br>(0.0003)   | -0.0004<br>(0.001)   | -0.0003<br>(0.001)    | -0.003***<br>(0.001)  |
| Female                 | -0.047***<br>(0.004) | -0.109***<br>(0.010) | -0.157***<br>(0.017) | 0.046***<br>(0.015)   | 0.062***<br>(0.022)   |
| Income                 | 0.012***<br>(0.001)  | 0.039***<br>(0.002)  | 0.048***<br>(0.004)  | -0.083***<br>(0.004)  | -0.048***<br>(0.006)  |
| (Religious) Disbelief  | 0.061***<br>(0.008)  | 0.114***<br>(0.019)  | 0.162***<br>(0.033)  | -0.122***<br>(0.031)  | -0.194***<br>(0.044)  |
| IT Familiarity         | 0.013***<br>(0.002)  | 0.022***<br>(0.004)  | 0.035***<br>(0.007)  | -0.051***<br>(0.006)  | -0.054***<br>(0.009)  |
| Political Trust        | 0.075***<br>(0.003)  | 0.187***<br>(0.007)  | 0.216***<br>(0.013)  | -0.049***<br>(0.012)  | 0.062***<br>(0.017)   |
| Econ. Globaliz.        |                      |                      |                      | 0.512***<br>(0.018)   | 0.498***<br>(0.025)   |
| GDP per capita         | -0.033<br>(0.030)    | -0.013***<br>(0.004) | -0.015***<br>(0.005) | -0.361***<br>(0.068)  | -0.373***<br>(0.067)  |
| Patent                 | -0.557***<br>(0.072) |                      |                      |                       |                       |
| Med/High Tech Industry | 0.133***<br>(0.008)  |                      |                      |                       |                       |
| Broadband              | -0.107**<br>(0.049)  |                      |                      |                       |                       |
| Constant               | 1.421**<br>(0.651)   | 4.596***<br>(0.093)  | 6.442***<br>(0.133)  | -20.046***<br>(1.881) | -18.812***<br>(2.037) |
| N                      | 61,958               | 68,303               | 68,303               | 64,886                | 64,886                |
| Countries              | 48                   | 53                   | 53                   | 51                    | 51                    |
| Country Random Effect  | ✓                    | ✓                    | ✓                    | ✓                     | ✓                     |

\*p < .1; \*\*p < .05; \*\*\*p < .01

Country-specific intercepts not reported due to space constraints.
